# Supplementary material for: Alterations of Gut Microbiota in Patients With Graves’ Disease
Source: PubMed Central journal article supplement (PMC8132172; doi:10.3389/fcimb.2021.663131), 2021-05-05
Supplement: Image_1.pdf [file Image_1.pdf]

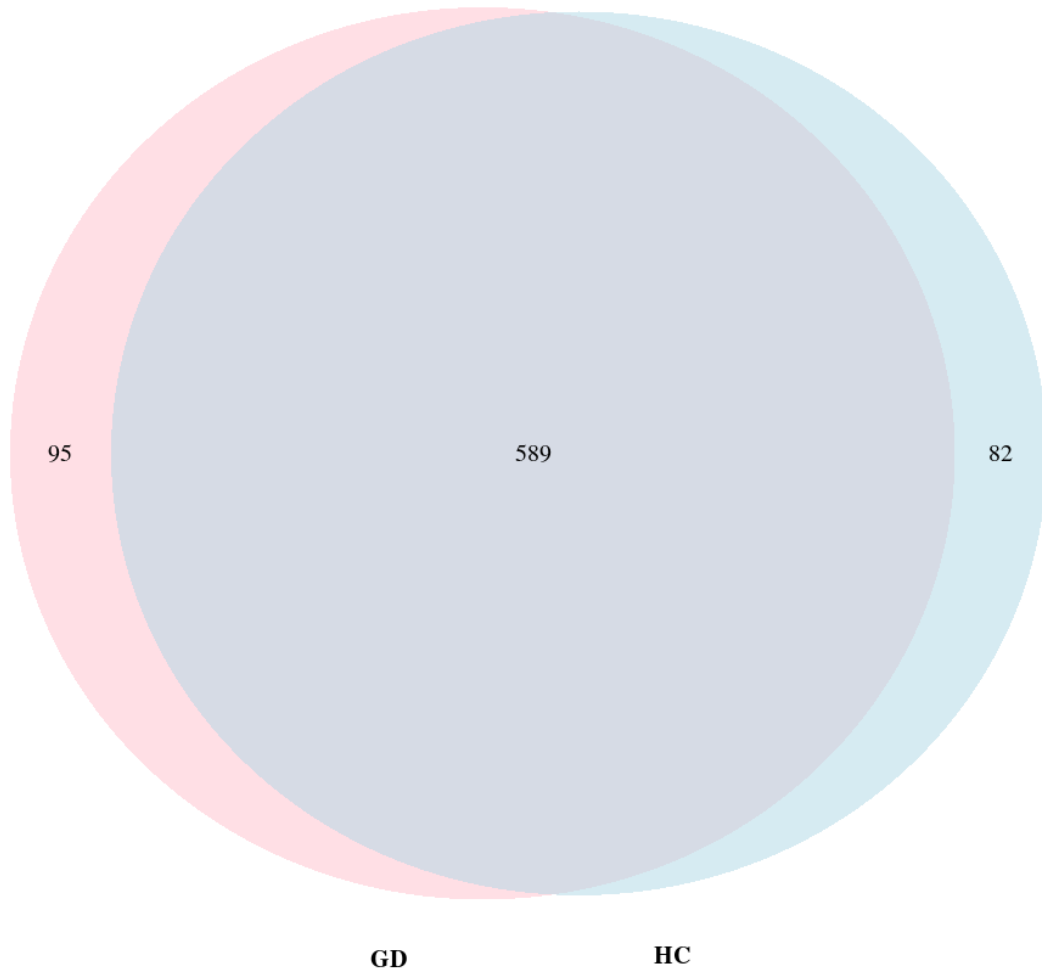

**Supplementary Figure S1.** Venn diagram illustrating the overlap of OTUs in the gut microbiota among the two groups

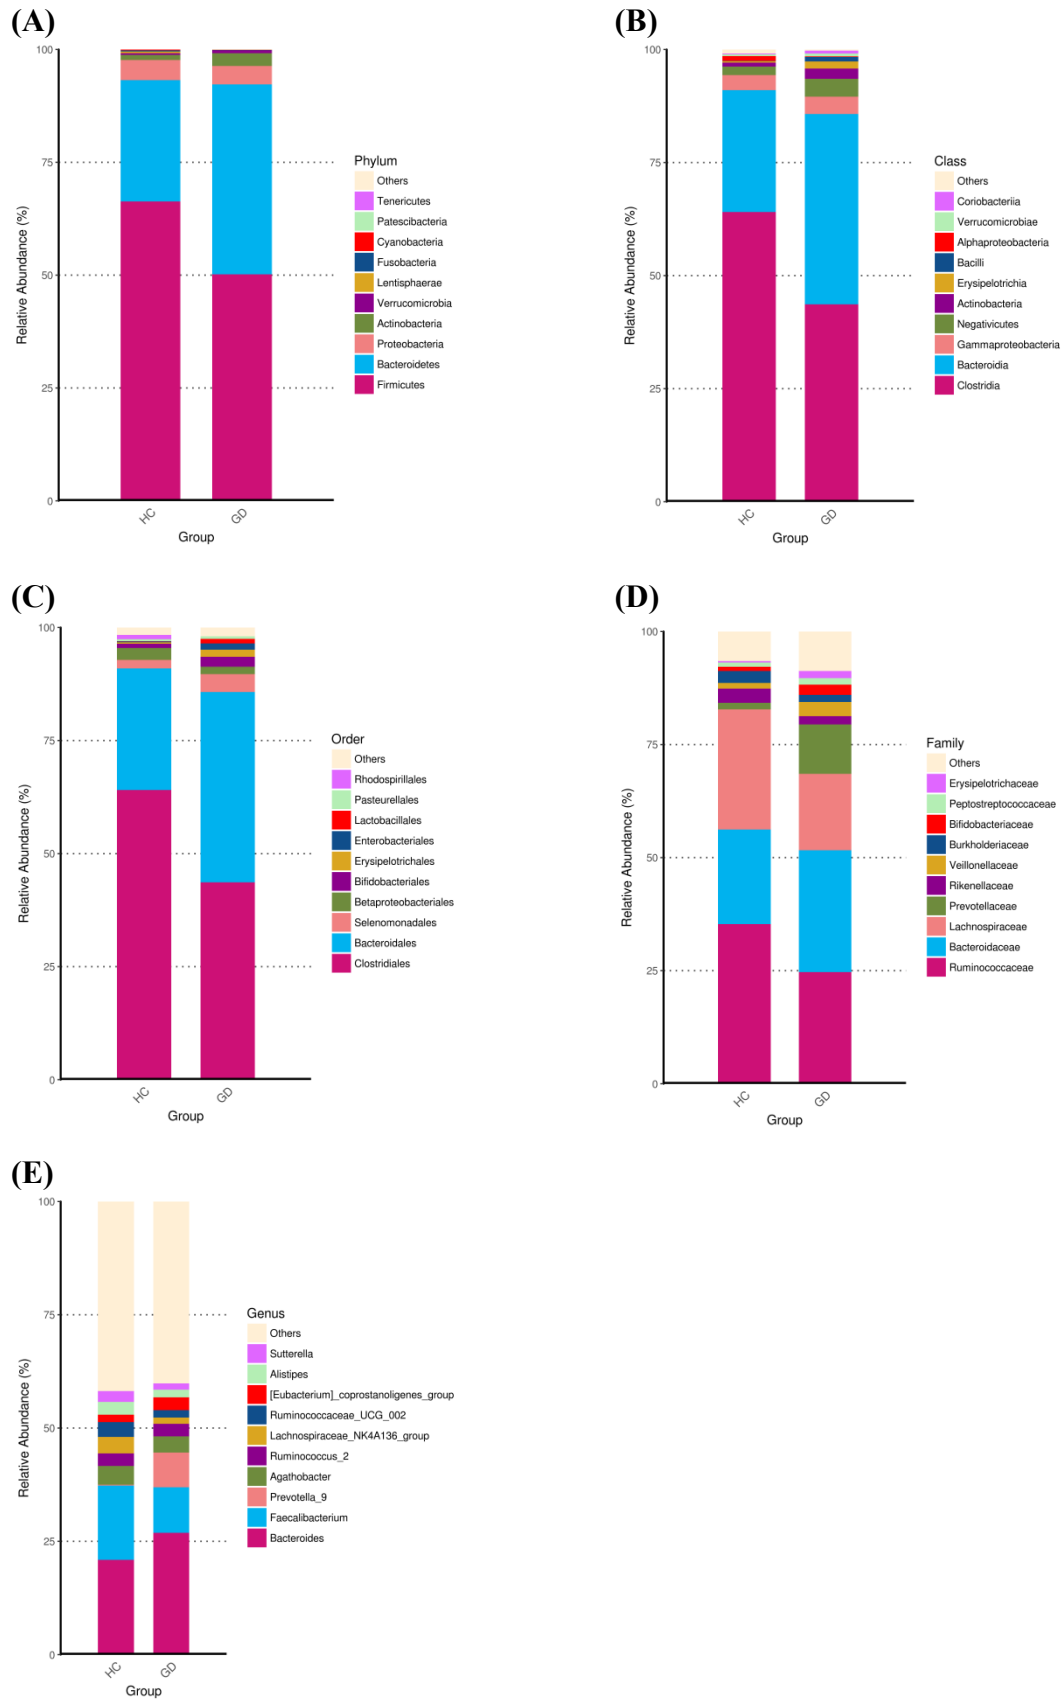

**Supplementary Figure S2.** Composition analysis of the gut microbiota at different taxonomic levels among the two groups: (A) phylum, (B) class, (C) order, (D) family, (E) genus. Only the top 10 most abundant OTUs are displayed.
